# Supplementary material
Source: Springer Nature journal article supplement (https://www.springermedizin.de/resource/supplementary/12974_2010_335_MOESM7_ESM.pdf/9601436)

**A**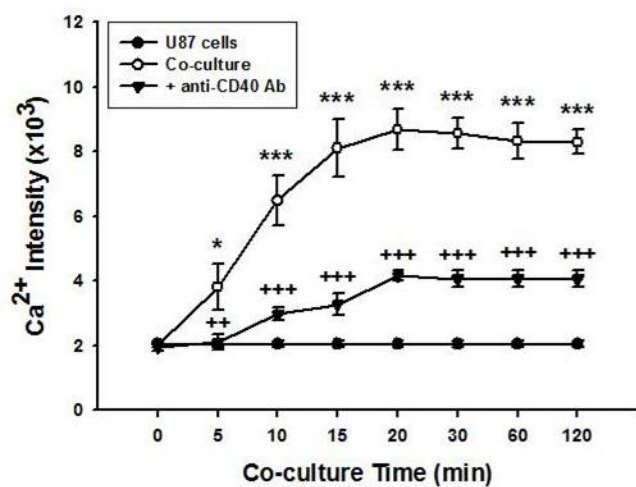**B**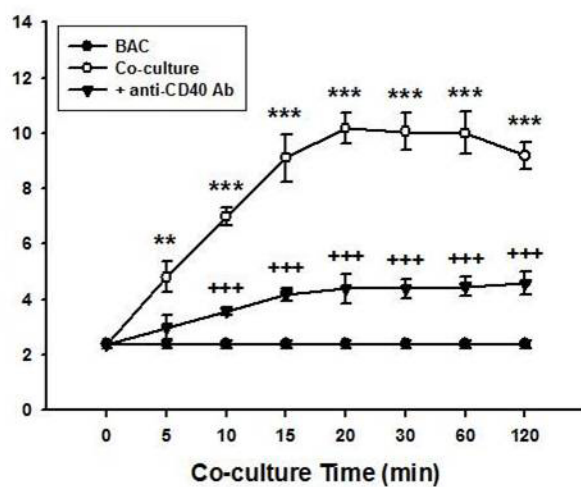**C**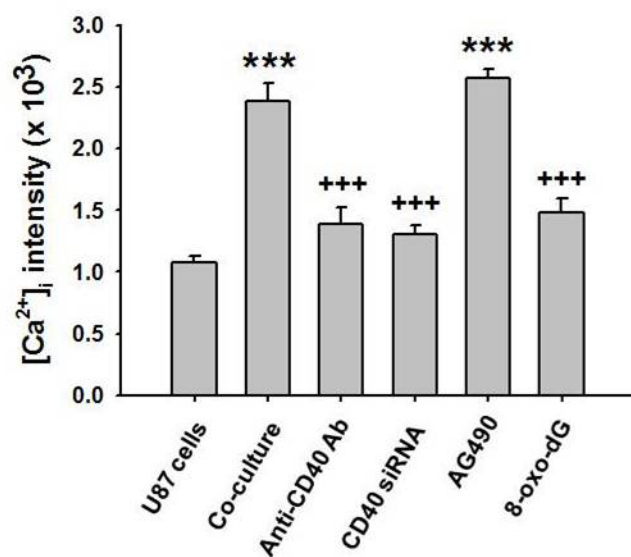**D**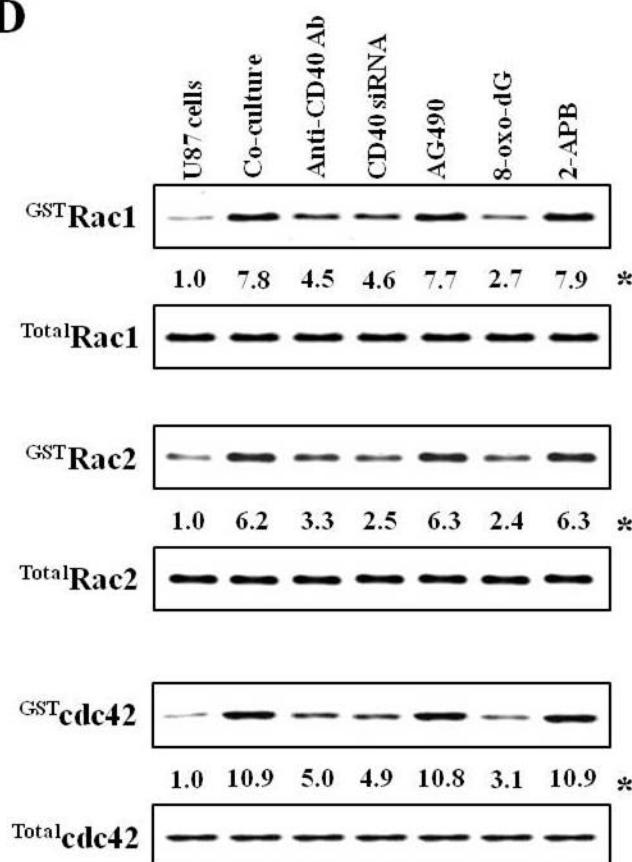**E**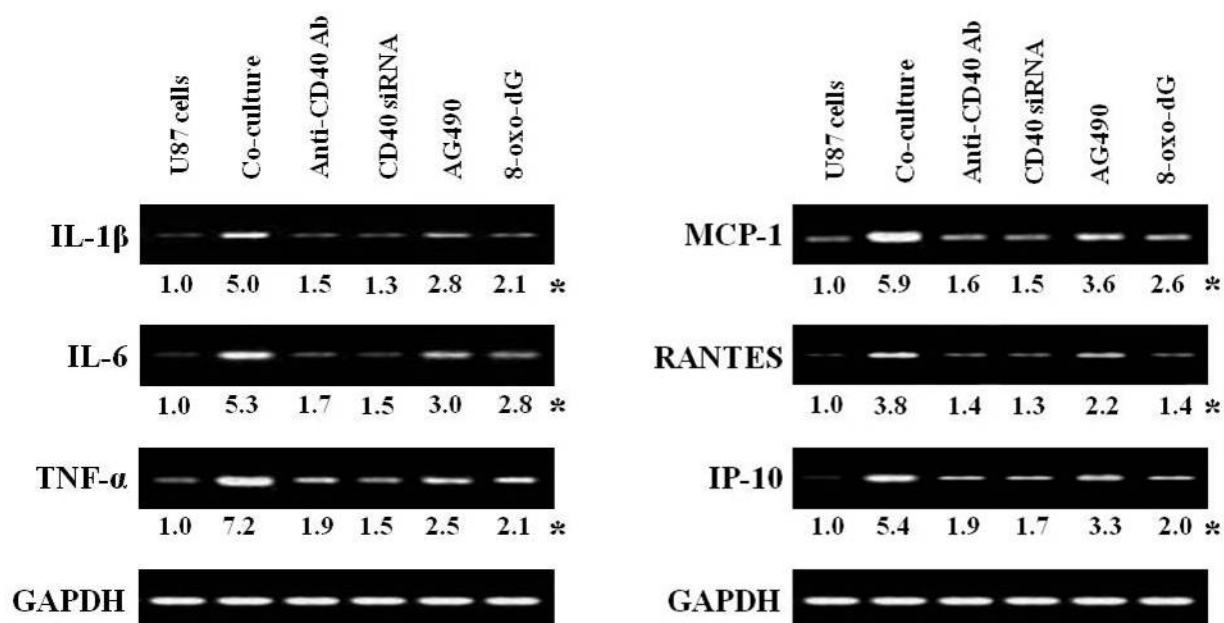

Supplement: MOESM7 [file 9601436]
